# Supplementary material for: Accelerated and Localized Synucleinopathy in a Hybrid Mouse Model: Implications for Positron Emission Tomography Studies
Source: Research Square preprint supplement (doi:10.21203/rs.3.rs-7821065/v1), 2025-10-30
Supplement: Supplementary file 1 [file 4e37ebb55bbddccf42b3d79c.docx]

**Accelerated and Localized Synucleinopathy in a Hybrid Mouse Model: Implications for Positron Emission Tomography Studies**

Chunfang A Xia1*, Hsiu-Ming Tsai1, Sandra Diaz Garcia 2, Shuanglong Liu3†, Alessandra Matzeu2, Mani Salarian1, Wouter Bruinzeel4, Anna K Szardenings1

1 Discovery Technologies and Molecular Pharmacology,Johnson & Johnson, San Diego, CA, USA.

2Preclinical Sciences and Translational Safety, Johnson & Johnson, San Diego, CA, USA.

3Global Discovery Chemistry, Johnson & Johnson, San Diego, CA, USA.

4Neuroscience Discovery, Johnson & Johnson, Beerse, Belgium

† Current Affiliation: Radalliance Therapeutics Inc., Shanghai, China

**Running title:** Evaluating a Hybrid PD Mouse Model with Regional Key Pathologies for PET Imaging studies

***Corresponding Author:**

Chunfang A Xia, PhD

Johnson & Johnson

3210 Merryfield Row, San Diego, CA 92121

Phone:858-320-3544

Email: cxia1@its.jnj.com

**Supplementary Materials**

**Supplementary Fig. 1**. Human p-syn aggregation after left-side SN injection of the AAV1/2-CMV/CBA-human-A53T-α-syn vector (2ul of 5x1012gc/mL). Representative immunostained coronal sections display the development of p-syn+ inclusions and aggregates in SN at 2 and 6 weeks (left), and at 4.5 and 10 months (middle) time points. The whole mouse brain section is highlighted (left and middle). Positive p-syn staining is observed until 4.5 months post-surgery. p-syn+ aggregation is detected at 4.5 and 10 months, as shown on the right. Scale bar = 50 µm.


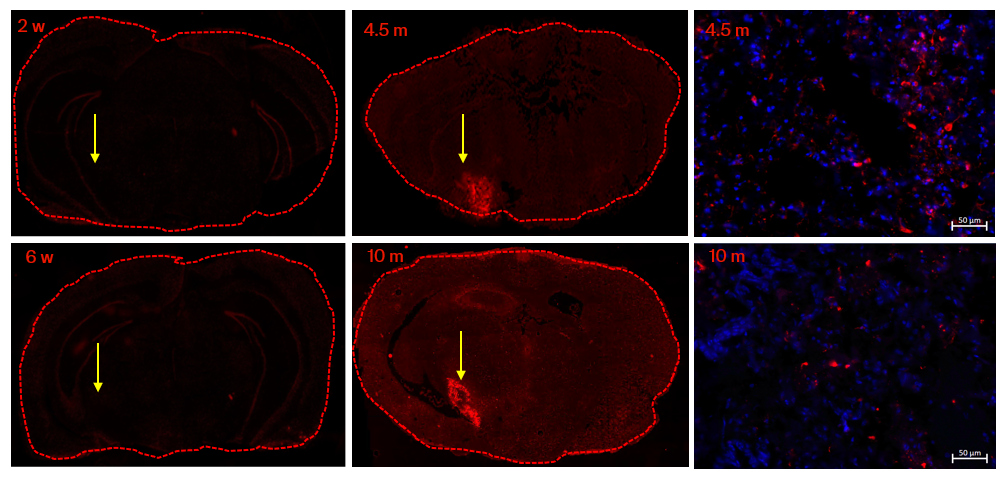


**Supplementary Table 1**: The quality control of [18F]JNJ-CSF1R-1, [18F]UCB-H, [18F]BCPP-EF, and [18F]AV133.

| **Target** | **Tracer** | **Decay corrected Yields (%)** | **Specific activity (mCi/µmol)** | **Radiochemical purity (%)** | **Retention time on analytical HPLC (min)** |
| --- | --- | --- | --- | --- | --- |
| CSF1R | [18F]JNJ-CSF1R-1 | 20.7 | 1945 | 98.2 | 5.1 |
| SV2A | [18F]UCB-H | 1.9 | 1830 | 100 | 6.0 |
| MC1 | [18F]BCPP-EF | 16.7 | 3880 | 98.9 | 6.8 |
| VMAT2 | [18F]AV133 | 24.1 | 1347 | 95.3 | 5.3 |

| Supplementary Table 2: Antibodies used in immunohistochemistry. |
| --- |

| **Target** | **Antibody** | **Vendor** | **Catalogue #** | **Clone Name** |
| --- | --- | --- | --- | --- |
| Pathologic α-syn | α-syn | abcam | ab13850 | MJFR1 |
| P-syn(p S129) | abcam | ab51253 | EP1536Y |
| DA Neuron loss | VMAT2 | ThermoFisher | OSV00111W-100UL | NA |
| TH | abcam | ab75875 | EP1533Y |
| Neuroinflammation | Iba1 | Fujifilm | 019-19741 | NA |
| TREM2 | Cell Signaling | #55739 | E4J7A |
| CSF1R | abcam | ab271294 | YEYE311 |
| Synaptic density | SV2A | Cell Signaling | #66724 | D1L8S |
| Mitochondrial function | ATP5A | abcam | ab14748 | 15H4C4 |
